# Supplementary material for: IL-12RB1: a novel immune prognostic biomarker for oral squamous cell carcinoma and linked to PD-1/PD-L1 expression in the tumor immune microenvironment
Source: PubMed Central journal article supplement — Ann Transl Med. 2022 Feb;10(3):144. doi: 10.21037/atm-21-6915 (PMC8904997; doi:10.21037/atm-21-6915), 2022-02
Supplement: atm-10-03-144-supplementary.pdf [file atm-10-03-144-supplementary.pdf]

**Table S1** Ninety DEGs extracted from TCGA database had the significant value on prognosis of OSCC patient

| Order number | Gene symbol |
|--------------|-------------|
| 1            | GZMK        |
| 2            | ADAMDEC1    |
| 3            | PLA2G2D     |
| 4            | IGHV3-73    |
| 5            | IGLV3-21    |
| 6            | OR2I1P      |
| 7            | MS4A1       |
| 8            | CXCR3       |
| 9            | IGHV3-33    |
| 10           | FASLG       |
| 11           | UBD         |
| 12           | IGHV3-30    |
| 13           | IGHGP       |
| 14           | TRBV19      |
| 15           | IGHV3-15    |
| 16           | GZMA        |
| 17           | NKG7        |
| 18           | IGLL5       |
| 19           | FCRL3       |
| 20           | IGHM        |
| 21           | TRBV5-1     |
| 22           | IGKV5-2     |
| 23           | IGHG2       |
| 24           | IDO1        |
| 25           | GZMM        |
| 26           | SIRPG       |
| 27           | IGHV1-69    |
| 28           | SH2D1A      |
| 29           | CCR5        |
| 30           | TRAV21      |
| 31           | CD40LG      |
| 32           | TRBV4-2     |
| 33           | IGHG3       |
| 34           | TRBC2       |

**Table S1** (continued)**Table S1** (continued)

| Order number | Gene symbol |
|--------------|-------------|
| 35           | IGHG1       |
| 36           | IGHV4-31    |
| 37           | LINC00861   |
| 38           | IKZF3       |
| 39           | TRBV28      |
| 40           | IGLV6-57    |
| 41           | LY9         |
| 42           | MYBPC1      |
| 43           | CD2         |
| 44           | IGLV7-43    |
| 45           | CD3E        |
| 46           | TRAV17      |
| 47           | IGHG4       |
| 48           | TIGIT       |
| 49           | AC015911.7  |
| 50           | TIFAB       |
| 51           | FCRL5       |
| 52           | GPR25       |
| 53           | SAMD3       |
| 54           | CXCR6       |
| 55           | WDFY4       |
| 56           | CD79A       |
| 57           | IL12RB1     |
| 58           | VCAM1       |
| 59           | SIT1        |
| 60           | CD5         |
| 61           | ABCD2       |
| 62           | BTLA        |
| 63           | RUFY4       |
| 64           | LINC00426   |
| 65           | SPOCK2      |
| 66           | CCR7        |
| 67           | TRAC        |
| 68           | ADH1B       |

**Table S1** (continued)

**Table S1** (*continued*)

| Order number | Gene symbol       |
|--------------|-------------------|
| 69           | <i>IL9R</i>       |
| 70           | <i>IGKV3D-11</i>  |
| 71           | <i>IGHJ3</i>      |
| 72           | <i>CD7</i>        |
| 73           | <i>IRF8</i>       |
| 74           | <i>GPR171</i>     |
| 75           | <i>CLECL1</i>     |
| 76           | <i>TRAV8-6</i>    |
| 77           | <i>KLRD1</i>      |
| 78           | <i>GRAP2</i>      |
| 79           | <i>ZAP70</i>      |
| 80           | <i>CHRM3-AS2</i>  |
| 81           | <i>CLEC9A</i>     |
| 82           | <i>CTLA4</i>      |
| 83           | <i>CD96</i>       |
| 84           | <i>NCR1</i>       |
| 85           | <i>CD28</i>       |
| 86           | <i>FAM30A</i>     |
| 87           | <i>TBC1D10C</i>   |
| 88           | <i>TNFRSF17</i>   |
| 89           | <i>AC105460.2</i> |
| 90           | <i>AC105460.1</i> |

DEGs, differentially expressed genes; TCGA, The Cancer Genome Atlas; OSCC, oral squamous cell carcinoma.
